# Supplementary material for: Characterization and Leaching Kinetics of Rare Earth Elements from Phosphogypsum in Hydrochloric Acid
Source: MDPI journal article supplement (doi:10.3390/min12060703), 2022-05-31
Supplement: s1 [file s1]

Archive with 1 entries (1 files):
- minerals-1738332-supplementary.pdf
